# Supplementary material for: Nitrogen input 15 N-signatures are reflected in plant 15 N natural abundances of sub-tropical forests in China
Source: Copernicus journal article supplement (doi:10.5194/bg-2016-439), 2016-12-01
Supplement: Supplementary file 1 [file bg-2016-439-supplement.pdf]

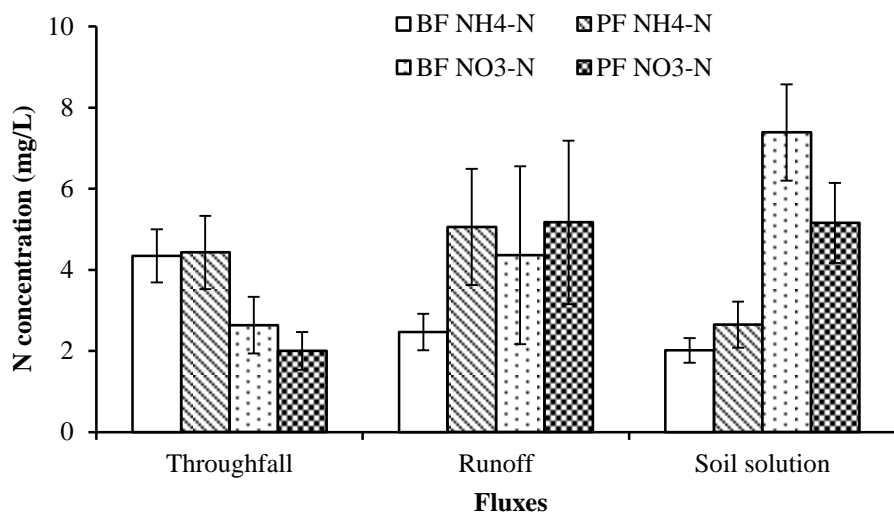

**Fig. 1** Mean concentration (mg N/L) of  $\text{NH}_4^+$ -N and  $\text{NO}_3^-$ -N in throughfall, surface runoff and seepage below 20 cm sampled from September 2012 to February 2013. Error bars indicate SE of plot means ( $n = 3$ ).
